# Supplementary material for: “direct Oral Anticoagulants Versus Low-molecular-weight Heparin for Acute Treatment of Venous Thromboembolism in Patients With Gastrointestinal Cancer: a Systematic Review and Meta-analysis”
Source: Research Square preprint supplement (doi:10.21203/rs.3.rs-871698/v1), 2021-09-15
Supplement: Supplementary file 1 [file 6e5f2a4e4b84cb95d69ec575.docx]

**Supplementary Data 1** – Searching strategy

**EMBASE Database**

1. ‘direct oral anticoagulant' /exp OR ‘direct oral anticoagulant'
2. ‘DOACS’/exp OR ‘DOACS’
3. ‘NOACS’/exp OR ‘NOACS’
4. ‘novel anticoagulant'’/exp OR ‘novel anticoagulant'’
5. ‘apixaban /exp OR ‘apixaban
6. ‘rivaroxaban’/exp OR ‘rivaroxaban’
7. ‘dabigatran /exp OR ‘dabigatran
8. ‘edoxaban’/exp OR ‘edoxaban’
9. ‘gastrointestinal’/exp OR ‘gastrointestinal’
10. / gastric’/exp OR ‘gastric’
11. ‘stomach’/exp OR ‘stomach’
12. ‘colon’/exp RO ‘colon’
13. ‘intestinal’/exp OR ‘intestinal'’
14. ‘rectal’/exp OR ‘rectal’
15. ‘hepatobiliary’/exp OR ‘hepatobiliary’
16. ‘pancreatic’/exp OR ‘pancreatic’
17. ‘cancer’/exp OR ‘cancer’
18. ‘malignancy’/exp OR ‘malignancy’
19. #1 OR #2 OR #3 OR #4 OR #5 OR #6 OR #7 OR #8
20. #9 OR #10 OR #11 OR #12 OR #13 OR #14 OR #15 OR #16
21. #17 OR #18
22. #19 AND #20 AND #21

**Ovid MEDLINE Database**

1. direct oral anticoagulant.mp
2. DOACS.mp.
3. NOACS.mp.
4. novel anticoagulant.mp.
5. apixaban.mp.
6. rivaroxaban.mp.
7. dabigratan.mp.
8. edoxaban.mp.
9. gastrointestinal.mp.
10. gastric.mp.
11. stomach.mp.
12. colon.mp.
13. intestinal.mp.
14. rectal.mp.
15. hepatobiliary.mp.
16. pancreatic.mp.
17. cancer.mp.
18. malignancy.mp.
19. 1 or 2 or 3 or 4 or 5 or 6 or 7 or 8
20. 9 or 10 or 11 or 12 or 13 or 14 or 15 or 16
21. 17 or 18
22. 19 and 20 and 21
